# Supplementary material for: Fully Printed Organic Phototransistor Array with High Photoresponse and Low Power
Source: MDPI journal article supplement (doi:10.3390/chemosensors11040231), 2023-04-07
Supplement: s1 [file s1]

Archive with 1 entries (1 files):
- chemosensors-2282625-supplementary.pdf
