# Supplementary material for: Fully Printed Organic Phototransistor Array with High Photoresponse and Low Power
Source: MDPI journal article supplement (doi:10.3390/chemosensors11040231), 2023-04-07
Supplement: s1 [file s1 › chemosensors-2282625-supplementary.pdf]

## Supplementary Materials

### Fully Printed Organic Phototransistor Array with High Photoresponse and Low Power

Yuan Tan<sup>1</sup>, Xinwei Zhang<sup>1</sup>, Rui Pan<sup>1</sup>, Wei Deng<sup>1,\*</sup>, Jialin Shi<sup>1</sup>, Tianxing Lu,<sup>1</sup> Junye

Zhang<sup>1</sup>, Jiansheng Jie<sup>1,2</sup>, and Xiujuan Zhang<sup>1,\*</sup>

<sup>1</sup>Institute of Functional Nano & Soft Materials (FUNSOM), Jiangsu Key Laboratory for Carbon-Based Functional Materials & Devices, Soochow University, Suzhou, Jiangsu 215123, China.

<sup>2</sup>Macao Institute of Materials Science and Engineering, Macau University of Science and Technology, Taipa, Macau SAR 999078, China.

\* Correspondence: dengwei@suda.edu.cn (W.D.); xjzhang@suda.edu.cn (X.J.Z)

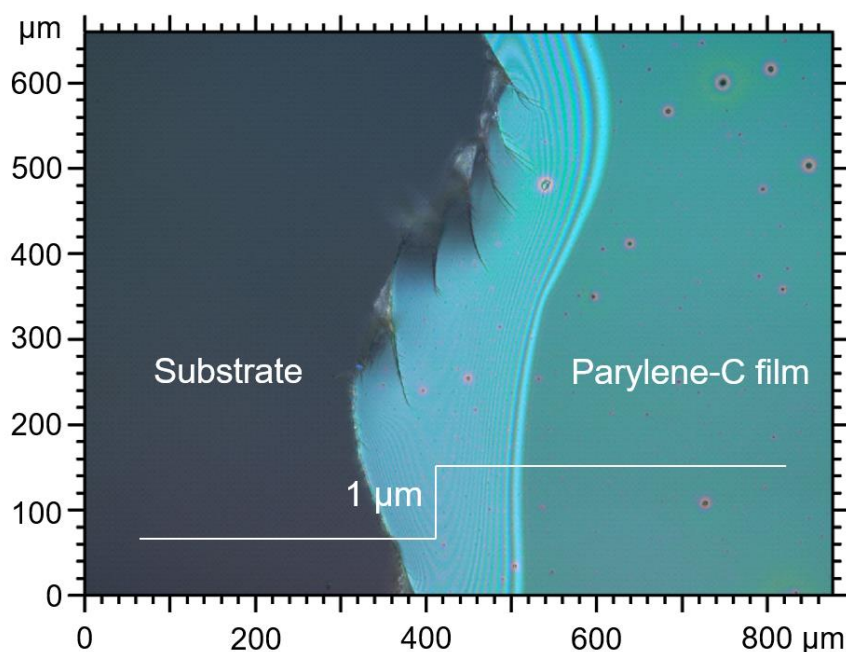

**Supplementary Figure 1.** 3D morphology of the Parylene-C layer with a thickness of 1.0 μm.

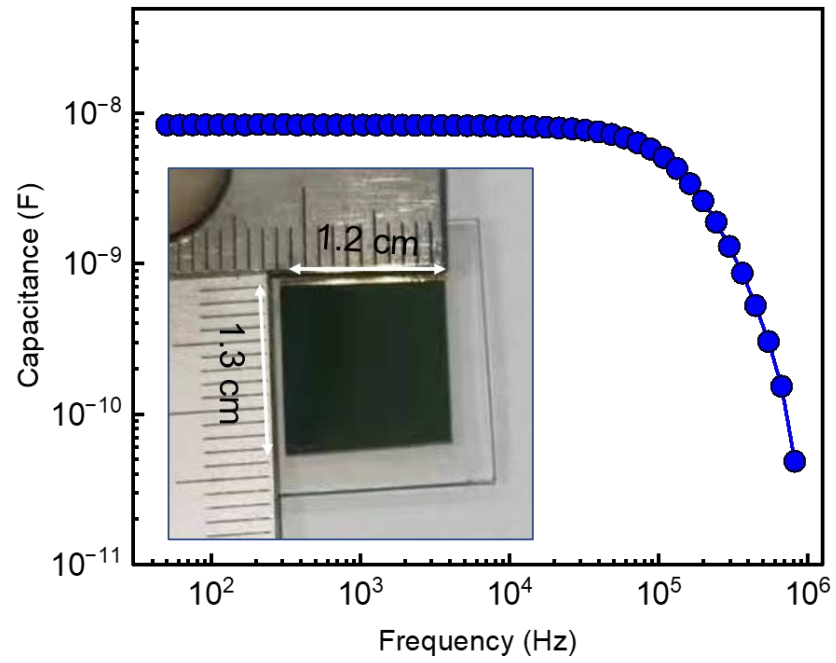

**Supplementary Figure 2.** Frequency dependence of capacitance for the blade-coated PVP dielectric. Inset: photograph of the capacitor.

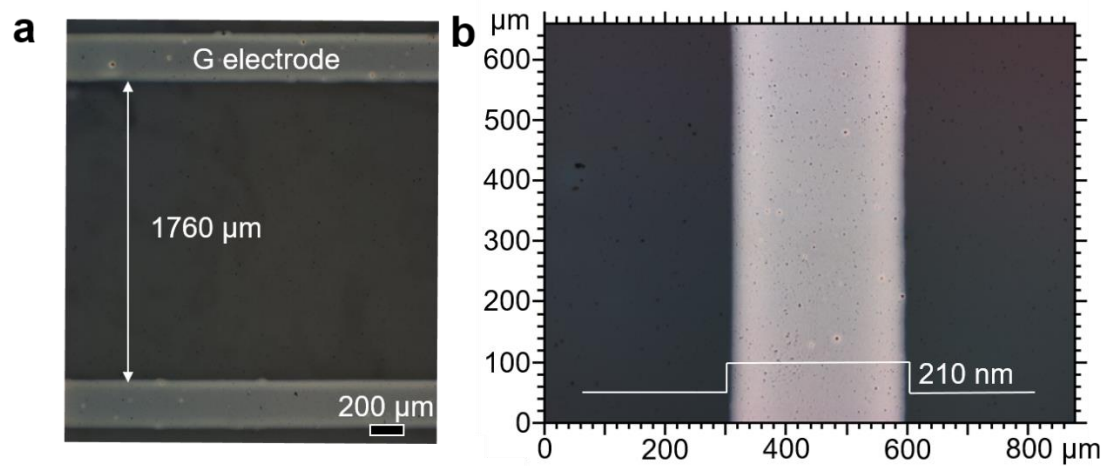

**Supplementary Figure 3.** (a) Optical image of the inkjet-printed gate electrodes with an interval of 1760  $\mu\text{m}$ . (b) 3D image of the gate electrodes with a thickness of 210 nm.

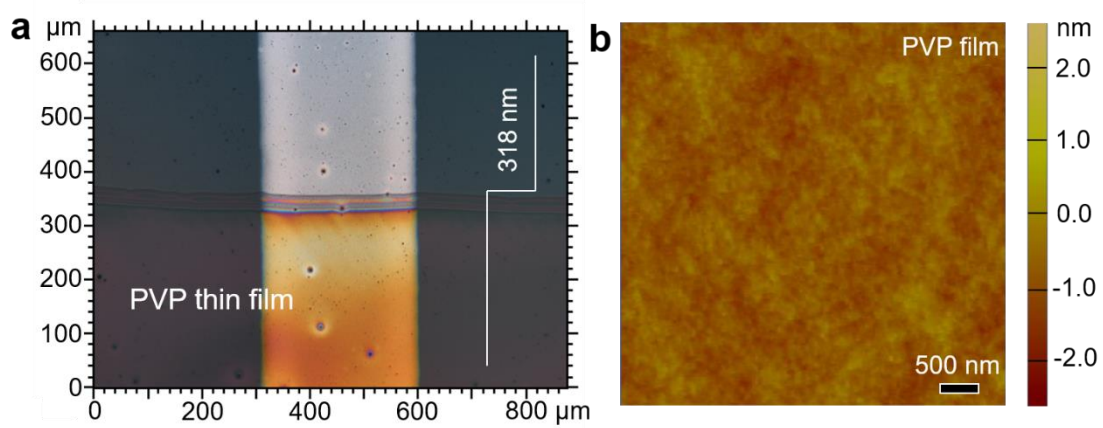

**Supplementary Figure 4.** (a) 3D morphology of the blade-coated PVP thin film. (b) Atomic force microscope image of PVP dielectric with a surface roughness of 0.27 nm.

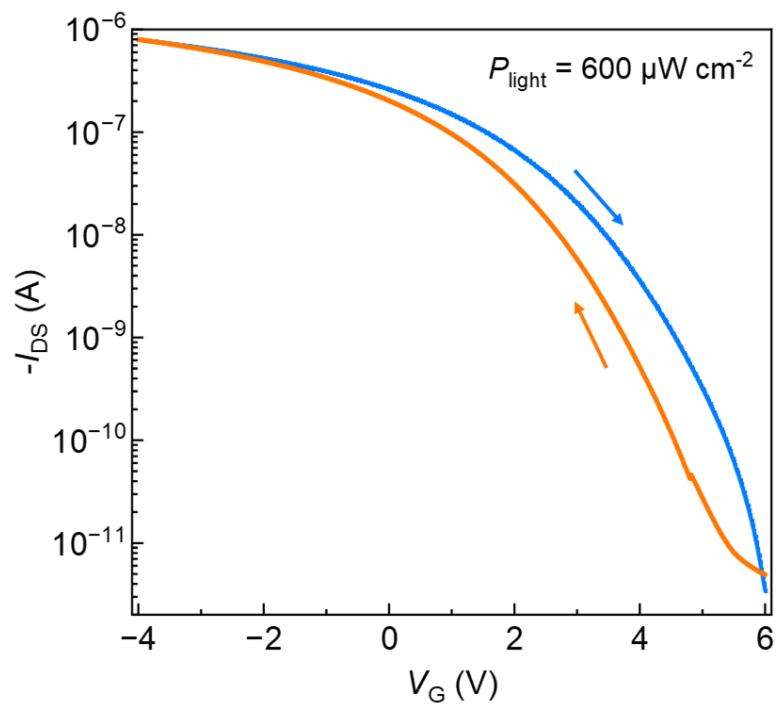

**Supplementary Figure 5.** Hysteresis of transfer curve of a fully printed OPT under white light illumination.

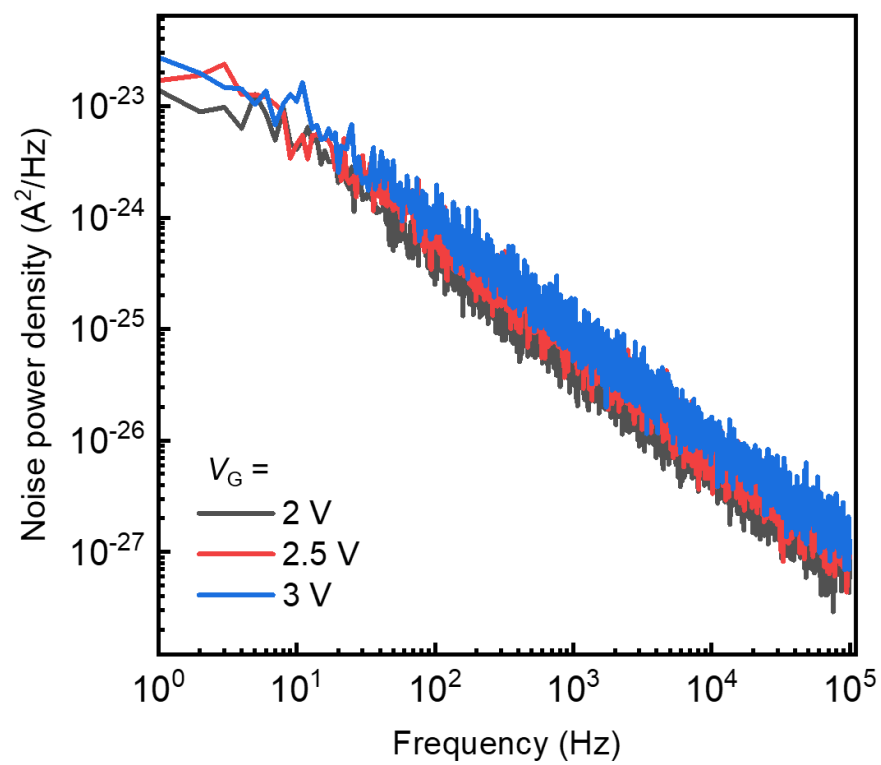

**Supplementary Figure 6.** Noise power density of the fully printed OPT at different gate voltage.

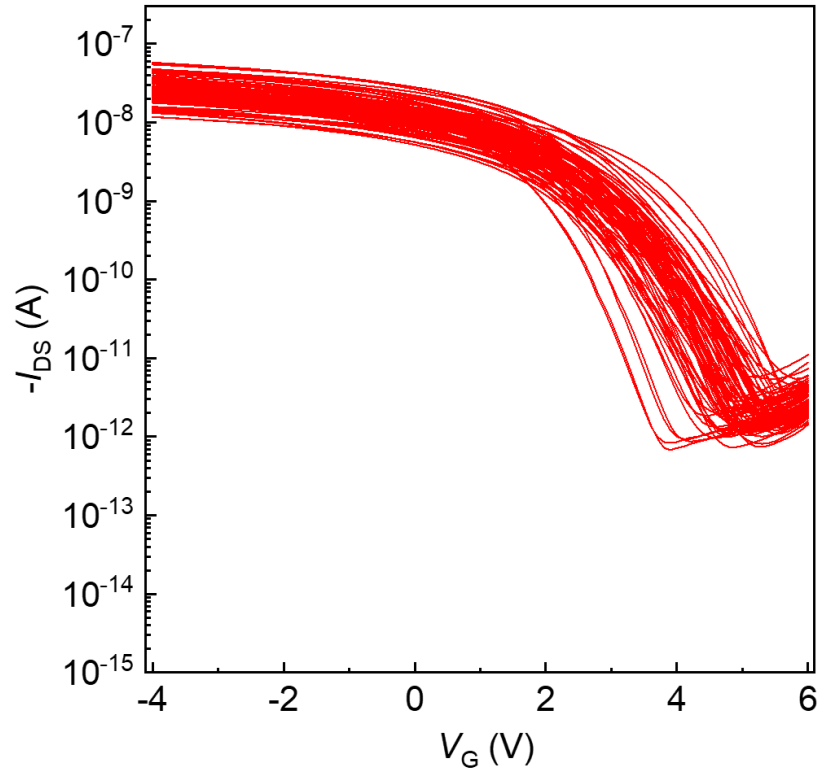

**Supplementary Figure 7.** Transfer characteristics of the OPTs under white light illumination ( $600 \mu\text{W}/\text{cm}^2$ ).

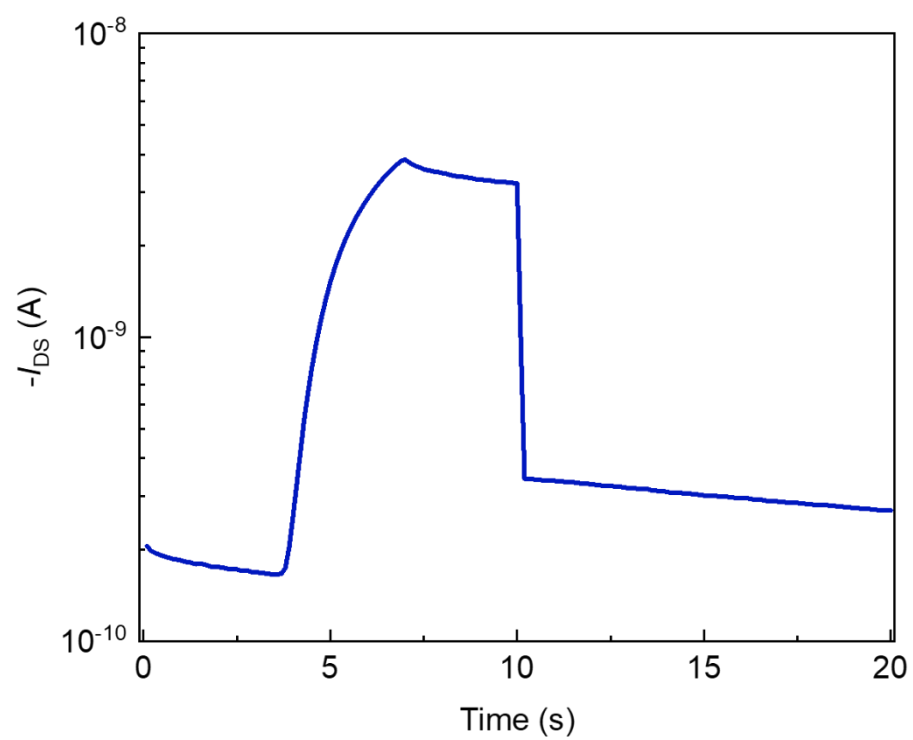

**Supplementary Figure 8.** Transient photoresponse of the OPT.
